# Supplementary material for: Diagnosis of Visceral Leishmaniasis in an Elimination Setting: A Validation Study of the Diagnostic Algorithm in India
Source: MDPI journal article supplement (doi:10.3390/diagnostics12030670), 2022-03-09
Supplement: s1 [file s1]

**Table S1:** VL cases reported from the selected PHC involved in patient recruitment (2014 – 2018).

| State | District    | Block    | 2014 | 2015 | 2016 | 2017 | 2018 | Grand Total | Population Block | Mean Annual Block incidence per 10,000 population (2014 - 2018) |
|-------|-------------|----------|------|------|------|------|------|-------------|------------------|-----------------------------------------------------------------|
| Bihar | Saran       | Garkha   | 106  | 81   | 109  | 110  | 120  | 526         | 268,156          | 3.92                                                            |
| Bihar | Saran       | Dariapur | 96   | 89   | 81   | 110  | 104  | 480         | 296,164          | 3.24                                                            |
| Bihar | Saran       | Sonepur  | 35   | 35   | 36   | 92   | 96   | 294         | 232,340          | 2.53                                                            |
| Bihar | Muzaffarpur | Kanti    | 26   | 18   | 15   | 10   | 5    | 74          | 247,807          | 0.60                                                            |
| UP    | Ballia      | Bairia   | 1    | 1    | 3    | 2    | 14   | 21          | 176,824          | 0.24                                                            |
| UP    | Ballia      | Bansdih  | 0    | 0    | 0    | 1    | 1    | 2           | 162,127          | 0.02                                                            |

PHC = Primary Health Care Center; UP = Uttar Pradesh. Population per block is based on the 2011 census data.
