# Supplementary material for: Diagnosis of Visceral Leishmaniasis in an Elimination Setting: A Validation Study of the Diagnostic Algorithm in India
Source: MDPI journal article supplement (doi:10.3390/diagnostics12030670), 2022-03-09
Supplement: s1 [file s1]

**Table S2:** VL cases reported from the selected clusters involved in recruitment of non-VL cases(2015 – 2020).

| State | District    | Block            | Cluster        | 2015 | 2016 | 2017 | 2018 | Population cluster<br>(at time of survey) | Status |
|-------|-------------|------------------|----------------|------|------|------|------|-------------------------------------------|--------|
| Bihar | Saran       | Dariapur         | Rampur Jagdish | 0    | 4    | 9    | 3    | 4054                                      | CE     |
| Bihar | Saran       | Dariapur         | Bishambarpur   | 1    | 2    | 16   | 11   | 4024                                      | CE     |
| Bihar | Muzaffarpur | Marwan           | Jhakara Sekh   | 0    | 0    | 0    | 0    | 3092                                      | PE     |
| Bihar | Muzaffarpur | Marwan           | Fanda          | 0    | 0    | 0    | 0    | 3931                                      | PE     |
| UP    | Chandauli   | Niyamatabad      | Panndit K. N.  | 0    | 0    | 0    | 0    | 954                                       | PE     |
| Bihar | Muzaffarpur | Kanti            | Panapur Kasba  | 0    | 0    | 0    | 0    | 1043                                      | NE     |
| UP    | Varanasi    | Kashi Vidyapeeth | Dangari Sarai  | 0    | 0    | 0    | 0    | 4922                                      | NE     |

UP = Uttar Pradesh; Panndit K.N. = Panndit Kapurwa Nagar; CE = currently endemic cluster; PE = previously endemic cluster; NE = non-endemic cluster. Population cluster is based on the inhabitants of the respective clusters at the time of data collection (2019-2020).
