# Supplementary material for: Diagnosis of Visceral Leishmaniasis in an Elimination Setting: A Validation Study of the Diagnostic Algorithm in India
Source: MDPI journal article supplement (doi:10.3390/diagnostics12030670), 2022-03-09

**Figure S1:** Summary of the parasitemia among qPCR positive incident VL cases diagnosed at PHC level based on the diagnostic algorithm (n = 70). Parasitemia is presented on a logarithmic scale ( $\log_{10}(\text{PGE/ml} + 1)$ ).

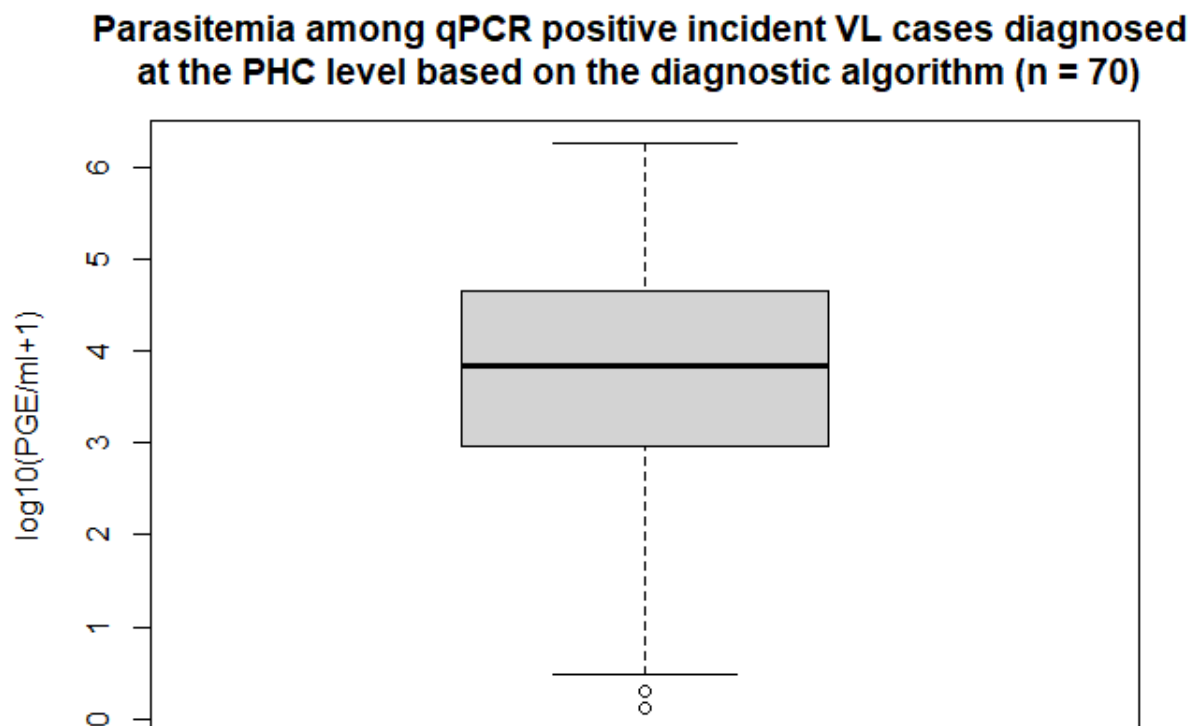

**Parasitemia among incident VL cases diagnosed at the PHC level  
based on the diagnostic algorithm (n = 74)**

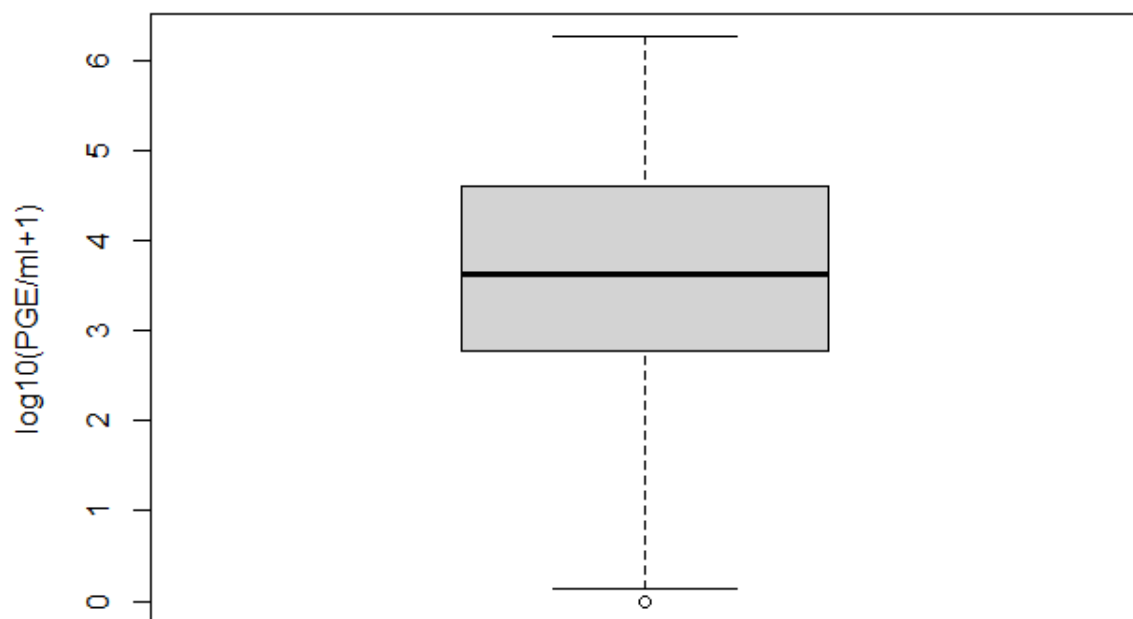

Supplement: s1 [file s1]
